# Supplementary material for: Deep learning-based building and road detection reveals higher permafrost thaw-related damage costs than previously estimated for Alaska
Source: Research Square preprint supplement (doi:10.21203/rs.3.rs-4783812/v1), 2024-09-27
Supplement: Supplementary file 1 [file c4ca9c5071d6a97d3b0696e8.xlsx]

## Sheet: ManosEtAl_Nature_SuppTable4
Supplementary Table. All 355 officially-recognized cities and census-designated places (CDP) (sorted alphabetically in ascending order) based on 2020 U.S. Census GIS data, downloaded from the Alaska Department of Labor and Workforce Development, Research and Analysis section (https://live.laborstats.alaska.gov/article/maps-gis-data). The "Mapped" field is a binary variable indicating whether a co…
NAME	Mapped
Adak city	1
Akhiok city	0
Akiachak CDP	1
Akiak city	1
Akutan city	1
Alakanuk city	1
Alatna CDP	1
Alcan Border CDP	1
Aleknagik city	0
Aleneva CDP	0
Allakaket city	1
Ambler city	1
Anaktuvuk Pass city	1
Anchor Point CDP	1
Anchorage municipality	1
Anderson city	0
Angoon city	1
Aniak city	0
Anvik city	0
Arctic Village CDP	1
Atka city	1
Atmautluak CDP	1
Atqasuk city	1
Attu Station CDP	0
Badger CDP	1
Bear Creek CDP	1
Beaver CDP	1
Beluga CDP	1
Bethel	1
Bettles city	1
Big Delta CDP	1
Big Lake CDP	1
Birch Creek CDP	0
Brevig Mission city	1
Buckland city	1
Buffalo Soapstone CDP	1
Butte CDP	1
Cantwell CDP	0
Central CDP	1
Chalkyitsik CDP	1
Chase CDP	0
Chefornak city	1
Chena Ridge CDP	1
Chenega CDP	1
Chevak city	1
Chickaloon CDP	0
Chicken CDP	0
Chignik city	1
Chignik Lagoon CDP	1
Chignik Lake CDP	0
Chiniak CDP	1
Chisana CDP	1
Chistochina CDP	1
Chitina CDP	1
Chuathbaluk city	0
Circle CDP	1
Clam Gulch CDP	1
Clark's Point city	1
Coffman Cove city	1
Cohoe CDP	1
Cold Bay city	1
Coldfoot CDP	1
College CDP	1
Cooper Landing CDP	1
Copper Center CDP	1
Cordova city	1
Covenant Life CDP	1
Craig city	1
Crooked Creek CDP	1
Crown Point CDP	1
Deering city	1
Delta Junction city	1
Deltana CDP	1
Denali Park CDP	1
Diamond Ridge CDP	1
Dillingham city	1
Diomede city	0
Dot Lake CDP	1
Dot Lake Village CDP	1
Dry Creek CDP	1
Eagle city	1
Eagle Village CDP	0
Eareckson Station CDP	0
Edna Bay city	0
Eek city	1
Egegik city	1
Eielson AFB CDP	1
Ekwok city	0
Elfin Cove CDP	1
Elim city	1
Emmonak city	1
Ester CDP	1
Eureka Roadhouse CDP	1
Evansville CDP	1
Excursion Inlet CDP	1
Fairbanks	1
False Pass city	0
Farm Loop CDP	1
Farmers Loop CDP	1
Ferry CDP	0
Fishhook CDP	1
Flat CDP	1
Fort Greely CDP	1
Fort Yukon city	1
Four Mile Road CDP	1
Fox CDP	1
Fox River CDP	1
Fritz Creek CDP	1
Funny River CDP	1
Gakona CDP	1
Galena city	1
Gambell city	1
Game Creek CDP	0
Gateway CDP	1
Glacier View CDP	0
Glennallen CDP	0
Goldstream CDP	1
Golovin city	1
Goodnews Bay city	1
Grayling city	1
Gulkana CDP	1
Gustavus city	1
Haines CDP	1
Halibut Cove CDP	0
Happy Valley CDP	1
Harding-Birch Lakes CDP	1
Healy CDP	1
Healy Lake CDP	0
Hobart Bay CDP	0
Hollis CDP	1
Holy Cross city	0
Homer city	1
Hoonah city	1
Hooper Bay city	1
Hope CDP	1
Houston city	1
Hughes city	0
Huslia city	1
Hydaburg city	1
Hyder CDP	1
Igiugig CDP	1
Iliamna CDP	1
Ivanof Bay CDP	1
Juneau city and borough	1
Kachemak city	1
Kake city	1
Kaktovik city	1
Kalifornsky CDP	1
Kaltag city	1
Karluk CDP	1
Kasaan city	1
Kasigluk CDP	0
Kasilof CDP	1
Kenai city	1
Kenny Lake CDP	0
Ketchikan city	1
Kiana city	1
King Cove city	1
King Salmon CDP	1
Kipnuk CDP	1
Kivalina city	1
Klawock city	1
Klukwan CDP	1
Knik River CDP	1
Knik-Fairview CDP	1
Kobuk city	1
Kodiak city	1
Kodiak Station CDP	1
Kokhanok CDP	1
Koliganek CDP	0
Kongiganak CDP	1
Kotlik city	1
Kotzebue city	1
Koyuk city	1
Koyukuk city	1
Kupreanof city	0
Kwethluk city	1
Kwigillingok CDP	1
Lake Louise CDP	0
Lake Minchumina CDP	1
Larsen Bay city	1
Lazy Mountain CDP	1
Levelock CDP	0
Lime Village CDP	0
Livengood CDP	1
Loring CDP	0
Lowell Point CDP	1
Lower Kalskag city	1
Lutak CDP	1
Manley Hot Springs CDP	1
Manokotak city	1
Marshall city	1
McCarthy CDP	1
McGrath city	0
Meadow Lakes CDP	1
Mekoryuk city	1
Mendeltna CDP	0
Mentasta Lake CDP	1
Mertarvik CDP	0
Metlakatla CDP	0
Mill Bay CDP	1
Minto CDP	1
Moose Creek CDP	1
Moose Pass CDP	1
Mosquito Lake CDP	1
Mountain Village city	1
Mud Bay CDP	1
Nabesna CDP	0
Naknek CDP	0
Nanwalek CDP	1
Napakiak city	1
Napaskiak city	1
Naukati Bay CDP	1
Nelchina CDP	1
Nelson Lagoon CDP	1
Nenana city	1
New Stuyahok city	1
Newhalen city	1
Newtok CDP	1
Nightmute city	1
Nikiski CDP	1
Nikolaevsk CDP	1
Nikolai city	0
Nikolski CDP	0
Ninilchik CDP	1
Noatak CDP	1
Nome city	1
Nondalton city	1
Noorvik city	1
North Lakes CDP	1
North Pole city	1
Northway CDP	1
Nuiqsut city	1
Nulato city	1
Nunam Iqua city	1
Nunapitchuk city	0
Old Harbor city	1
Oscarville CDP	1
Ouzinkie city	1
Palmer city	1
Paxson CDP	0
Pedro Bay CDP	0
Pelican city	1
Perryville CDP	1
Petersburg CDP	1
Petersville CDP	1
Pilot Point city	1
Pilot Station city	1
Pitkas Point CDP	1
Platinum city	1
Pleasant Valley CDP	0
Point Baker CDP	0
Point Hope city	1
Point Lay CDP	1
Point MacKenzie CDP	1
Point Possession CDP	1
Pope-Vannoy Landing CDP	0
Port Alexander city	0
Port Alsworth CDP	0
Port Clarence CDP	1
Port Graham CDP	1
Port Heiden city	0
Port Lions city	1
Port Protection CDP	0
Portage Creek CDP	1
Primrose CDP	1
Prudhoe Bay CDP	0
Quinhagak city	1
Rampart CDP	0
Red Devil CDP	0
Red Dog Mine CDP	1
Ridgeway CDP	1
Ruby city	0
Russian Mission city	1
Salamatof CDP	1
Salcha CDP	1
Sand Point city	1
Savoonga city	1
Saxman city	1
Scammon Bay city	1
Selawik city	1
Seldovia city	0
Seldovia Village CDP	1
Seward city	1
Shageluk city	1
Shaktoolik city	1
Shishmaref city	1
Shungnak city	1
Silver Springs CDP	1
Sitka city and borough	1
Skagway CDP	1
Skwentna CDP	1
Slana CDP	1
Sleetmute CDP	0
Soldotna city	1
South Lakes CDP	1
South Naknek CDP	0
South Van Horn CDP	1
St. George city	1
St. Mary's	1
St. Michael city	1
St. Paul city	0
Stebbins city	1
Steele Creek CDP	1
Sterling CDP	1
Stevens Village CDP	1
Stony River CDP	1
Sunrise CDP	1
Susitna CDP	0
Susitna North CDP	1
Sutton-Alpine CDP	1
Takotna CDP	1
Talkeetna CDP	0
Tanacross CDP	0
Tanaina CDP	1
Tanana city	0
Tatitlek CDP	1
Tazlina CDP	1
Teller city	1
Tenakee Springs city	1
Tetlin CDP	1
Thorne Bay city	1
Togiak city	1
Tok CDP	1
Toksook Bay	1
Tolsona CDP	0
Tonsina CDP	0
Trapper Creek CDP	1
Tuluksak CDP	1
Tuntutuliak CDP	1
Tununak CDP	1
Twin Hills CDP	1
Two Rivers CDP	1
Tyonek CDP	1
Ugashik CDP	1
Unalakleet city	1
Unalaska city	1
Upper Kalskag city	1
Utqiagvik	1
Valdez city	1
Venetie CDP	1
Wainwright	1
Wales city	1
Wasilla city	1
Whale Pass city	0
White Mountain city	1
Whitestone CDP	1
Whitestone Logging Camp CDP	1
Whittier city	1
Willow CDP	1
Willow Creek CDP	1
Wiseman CDP	1
Womens Bay CDP	1
Wrangell city and borough	1
Yakutat CDP	1
