# Supplementary material for: Deep learning-based building and road detection reveals higher permafrost thaw-related damage costs than previously estimated for Alaska
Source: Research Square preprint supplement (doi:10.21203/rs.3.rs-4783812/v1), 2024-09-27
Supplement: Supplementary file 2 [file dc37de4e4e2088d1d0ec7499.xlsx]

## Sheet: combined_town_costsFINAL
Supplementary Table. Projected average damage costs of buildings and roads in Alaskan communities on discontinuous and continuous permafrost at risk of bearing capacity loss and ground subsidence (sorted by total cost). Infrastructure damage costs are calculated separately based on bearing capacity loss and subsidence projected by the AWI-CM-1-1-MR, MPI-ESM1-2-HR, and NorESM2-MM GCMs analyzed und…
NAME	Average building cost	Average per capita building cost	Average road cost	Average per capita road cost	Total cost	Per capita cost
Fairbanks city	2.70533e+09	83202.5	6.81845e+08	20970.2	3.38717e+09	104173
Prudhoe Bay CDP	9.60252e+08	733017	9.0085e+08	687672	1.8611e+09	1.42069e+06
Badger CDP	1.03314e+09	54287.1	5.27208e+08	27702.6	1.56035e+09	81989.7
College CDP	9.24781e+08	81608	4.51871e+08	39875.6	1.37665e+09	121484
Bethel city	9.86319e+08	155940	1.98044e+08	31311.2	1.18436e+09	187251
Deltana CDP	3.89565e+08	165140	4.7513e+08	201411	8.64694e+08	366551
Utqiagvik city	6.47198e+08	131358	1.32151e+08	26821.9	7.7935e+08	158179
Steele Creek CDP	4.27802e+08	66459.9	3.44679e+08	53546.6	7.72482e+08	120006
Goldstream CDP	2.65772e+08	80561.4	4.50144e+08	136449	7.15916e+08	217010
Chena Ridge CDP	3.14564e+08	52296.6	3.0003e+08	49880.4	6.14595e+08	102177
Eielson AFB CDP	4.31777e+08	165432	1.54623e+08	59242.4	5.86399e+08	224674
Farmers Loop CDP	3.06198e+08	65093.1	2.26705e+08	48194	5.32903e+08	113287
South Van Horn CDP	3.51523e+08	698852	1.23746e+08	246016	4.75269e+08	944868
Kotzebue city	3.56144e+08	114811	1.11888e+08	36069.7	4.68032e+08	150881
Ester CDP	9.99638e+07	41375.7	3.12861e+08	129495	4.12825e+08	170871
Delta Junction city	2.33504e+08	254361	1.23018e+08	134006	3.56521e+08	388367
Tok CDP	1.74684e+08	140534	1.31933e+08	106141	3.06617e+08	246675
Nome city	1.81261e+08	49002.7	1.23858e+08	33484.1	3.05119e+08	82486.8
Glennallen CDP	1.00965e+08	229988	1.94064e+08	442059	2.95029e+08	672047
North Pole city	2.15278e+08	95977.6	7.62374e+07	33989	2.91515e+08	129967
Big Delta CDP	9.83564e+07	221523	1.92613e+08	433812	2.90969e+08	655335
Eureka Roadhouse CDP	4.32946e+06	180394	2.11789e+08	8.82452e+06	2.16118e+08	9.00492e+06
Red Dog Mine CDP	1.53005e+08	3.0601e+07	5.55912e+07	1.11182e+07	2.08596e+08	4.17192e+07
Fort Greely CDP	1.30882e+08	423568	7.60231e+07	246029	2.06906e+08	669597
Chistochina CDP	2.15015e+07	358359	1.84338e+08	3.0723e+06	2.0584e+08	3.43066e+06
Healy CDP	5.47843e+07	56712.5	1.49455e+08	154715	2.04239e+08	211428
Slana CDP	3.29076e+07	283686	1.68971e+08	1.45665e+06	2.01879e+08	1.74033e+06
Denali Park CDP	1.0235e+08	627913	9.1714e+07	562663	1.94064e+08	1.19058e+06
Kenny Lake CDP	2.51563e+07	107506	1.55807e+08	665840	1.80963e+08	773346
Point Hope city	1.11124e+08	133884	5.93607e+07	71518.9	1.70484e+08	205403
Gakona CDP	4.86574e+07	287913	1.0288e+08	608759	1.51538e+08	896672
Livengood CDP	1.66887e+07	1.04304e+06	1.32782e+08	8.29888e+06	1.49471e+08	9.34192e+06
Salcha CDP	2.7856e+07	28511.8	1.19618e+08	122434	1.47474e+08	150945
Galena city	8.61061e+07	182428	5.98655e+07	126834	1.45972e+08	309262
Copper Center CDP	4.87414e+07	144205	9.40808e+07	278346	1.42822e+08	422551
Wainwright city	8.58103e+07	136641	3.69533e+07	58842.8	1.22764e+08	195483
Fox CDP	5.21233e+07	128382	6.46904e+07	159336	1.16814e+08	287718
Mendeltna CDP	5.09868e+06	141630	1.10788e+08	3.07745e+06	1.15887e+08	3.21908e+06
Harding-Birch Lakes CDP	3.29606e+07	130279	8.18725e+07	323607	1.14833e+08	453886
Anderson city	7.89329e+07	445948	3.3872e+07	191367	1.12805e+08	637316
Central CDP	9.78935e+06	148324	1.02738e+08	1.55664e+06	1.12527e+08	1.70496e+06
Emmonak city	8.73811e+07	105916	2.39833e+07	29070.6	1.11364e+08	134987
Willow Creek CDP	1.65696e+07	87208.2	9.45708e+07	497741	1.1114e+08	584949
McCarthy CDP	2.49178e+07	232876	8.55912e+07	799918	1.10509e+08	1.03279e+06
Nuiqsut city	7.82994e+07	152929	3.13151e+07	61162.3	1.09615e+08	214091
St. Mary's city	4.18652e+07	69891.8	6.2293e+07	103995	1.04158e+08	173887
Chitina CDP	1.25115e+07	123876	8.43037e+07	834690	9.68151e+07	958566
Mountain Village city	6.19324e+07	99730.1	3.24237e+07	52212	9.43561e+07	151942
Fort Yukon city	4.20463e+07	98239.1	5.02381e+07	117379	9.22844e+07	215618
Atqasuk city	4.97525e+07	180263	4.20003e+07	152175	9.17528e+07	332438
Chevak city	6.88898e+07	72439.3	2.23278e+07	23478.2	9.12176e+07	95917.6
Arctic Village CDP	2.26942e+07	150292	6.849e+07	453576	9.11842e+07	603869
Mentasta Lake CDP	7.00526e+06	55159.5	8.32807e+07	655754	9.0286e+07	710913
Wiseman CDP	9.75223e+06	1.95045e+06	7.96846e+07	1.59369e+07	8.94369e+07	1.78874e+07
Paxson CDP	1.12245e+07	431713	7.81188e+07	3.00457e+06	8.93434e+07	3.43628e+06
Alakanuk city	5.7109e+07	75540.9	3.17679e+07	42021.1	8.88769e+07	117562
Hooper Bay city	6.89163e+07	50120.9	1.98652e+07	14447.4	8.87815e+07	64568.4
Coldfoot CDP	7.27417e+06	213946	8.04268e+07	2.3655e+06	8.7701e+07	2.57944e+06
Kwethluk city	6.56414e+07	80839.2	2.17049e+07	26730.2	8.73463e+07	107569
Nunapitchuk city	5.14391e+07	86597.7	3.56081e+07	59946.4	8.70472e+07	146544
Gambell city	5.63995e+07	88124.3	2.98345e+07	46616.5	8.62341e+07	134741
Gulkana CDP	1.93412e+07	175829	6.58187e+07	598352	8.51599e+07	774181
Tazlina CDP	1.53419e+07	62876.8	6.71154e+07	275063	8.24574e+07	337940
Kotlik city	5.8783e+07	89745.1	2.25566e+07	34437.6	8.13397e+07	124183
Two Rivers CDP	1.88999e+07	29076.7	6.22166e+07	95717.9	8.11165e+07	124795
Pleasant Valley CDP	5.90794e+06	9749.08	7.50186e+07	123793	8.09265e+07	133542
Akiachak CDP	6.14201e+07	90723.9	1.53136e+07	22619.8	7.67337e+07	113344
Noorvik city	5.66515e+07	81630.4	1.99702e+07	28775.5	7.66217e+07	110406
Stebbins city	5.25607e+07	82903.3	2.26928e+07	35793.1	7.52535e+07	118696
Selawik city	6.0965e+07	75358.4	1.27613e+07	15774.2	7.37263e+07	91132.6
Point Lay CDP	4.96371e+07	150415	2.32394e+07	70422.4	7.28765e+07	220838
Nenana city	3.4809e+07	97231.9	3.7926e+07	105939	7.2735e+07	203170
Tanana city	2.3238e+07	94463.5	4.59163e+07	186652	6.91543e+07	281115
Noatak CDP	4.92652e+07	86430.1	1.91614e+07	33616.5	6.84266e+07	120047
Pilot Station city	4.79217e+07	77921.4	1.87962e+07	30562.9	6.67179e+07	108484
Nelchina CDP	8.91771e+06	198171	5.46834e+07	1.21519e+06	6.36011e+07	1.41336e+06
Marshall city	4.26179e+07	86621.7	2.08686e+07	42415.9	6.34865e+07	129038
Minto CDP	1.20316e+07	80210.6	5.08698e+07	339132	6.29014e+07	419343
Savoonga city	4.40702e+07	52778.7	1.86495e+07	22334.8	6.27197e+07	75113.5
Ambler city	2.81715e+07	102816	3.3859e+07	123573	6.20305e+07	226389
Northway CDP	9.67047e+06	41326.8	5.17718e+07	221247	6.14423e+07	262574
McGrath city	2.26144e+07	75131	3.48843e+07	115895	5.74987e+07	191026
Kobuk city	1.72419e+07	90271.7	3.98005e+07	208380	5.70424e+07	298651
Kaltag city	2.1594e+07	136671	3.52735e+07	223250	5.68675e+07	359921
Kiana city	4.55134e+07	101820	1.08213e+07	24208.6	5.63347e+07	126028
Moose Creek CDP	3.13442e+07	58696.9	2.48001e+07	46442.2	5.61443e+07	105139
Allakaket city	1.65841e+07	93695.4	3.81204e+07	215369	5.47044e+07	309065
Anaktuvuk Pass city	3.66455e+07	86224.7	1.71336e+07	40314.3	5.37791e+07	126539
Kwigillingok CDP	1.58228e+07	41638.9	3.75083e+07	98706.2	5.33311e+07	140345
Wales city	3.75435e+07	223473	1.50944e+07	89847.9	5.2638e+07	313321
Silver Springs CDP	2.96524e+07	267139	2.24368e+07	202133	5.20892e+07	469272
Holy Cross city	0	0	5.19192e+07	294995	5.19192e+07	294995
Tolsona CDP	5.12335e+06	426946	4.52867e+07	3.77389e+06	5.041e+07	4.20083e+06
Aniak city	1.22115e+07	24085.9	3.71453e+07	73264.9	4.93568e+07	97350.8
Circle CDP	6.04706e+06	66451.2	4.28074e+07	470411	4.88544e+07	536862
Upper Kalskag city	2.83962e+07	133944	2.02683e+07	95605	4.86644e+07	229549
Newtok CDP	4.16489e+07	199277	6.2628e+06	29965.6	4.79117e+07	229243
Cantwell CDP	7.17422e+06	35871.1	4.04297e+07	202149	4.7604e+07	238020
Chicken CDP	5.3641e+06	447008	4.20195e+07	3.50162e+06	4.73836e+07	3.94863e+06
Akiak city	3.17817e+07	68791.5	1.42632e+07	30872.8	4.60449e+07	99664.3
Nulato city	2.41456e+07	101028	2.12759e+07	89020.7	4.54215e+07	190048
Scammon Bay city	3.38348e+07	56391.4	1.13969e+07	18994.8	4.52317e+07	75386.1
Tonsina CDP	1.37037e+07	249158	3.13347e+07	569722	4.50384e+07	818880
Tuntutuliak CDP	1.54685e+07	32981.9	2.79885e+07	59676.9	4.3457e+07	92658.8
Tuluksak CDP	3.37887e+07	76100.8	9.6663e+06	21771	4.3455e+07	97871.7
Whitestone CDP	8.43625e+06	118820	3.47814e+07	489879	4.32177e+07	608700
Rampart CDP	118771	2083.71	4.27012e+07	749143	4.28199e+07	751227
Lake Louise CDP	6.88335e+06	458890	3.55688e+07	2.37125e+06	4.24521e+07	2.83014e+06
Venetie CDP	1.73032e+07	84405.7	2.45258e+07	119638	4.18289e+07	204044
Napaskiak city	2.86751e+07	56336.2	1.29517e+07	25445.4	4.16268e+07	81781.6
Dot Lake CDP	3.6723e+06	174871	3.78267e+07	1.80127e+06	4.1499e+07	1.97614e+06
Kipnuk CDP	1.98888e+07	28251.1	2.15116e+07	30556.2	4.14003e+07	58807.3
Kongiganak CDP	2.59943e+07	53486.1	1.52758e+07	31431.7	4.12701e+07	84917.9
White Mountain city	2.0919e+07	113076	1.89203e+07	102272	3.98394e+07	215348
Ruby city	1.52741e+07	109886	2.38762e+07	171772	3.91503e+07	281657
Chuathbaluk city	2.05002e+07	197118	1.82929e+07	175893	3.87931e+07	373011
Nabesna CDP	1.12044e+06	560219	3.66742e+07	1.83371e+07	3.77946e+07	1.88973e+07
Lower Kalskag city	2.19434e+07	78933	1.57914e+07	56803.7	3.77348e+07	135737
Eek city	2.54724e+07	63050.5	1.17638e+07	29118.2	3.72362e+07	92168.7
Russian Mission city	2.50326e+07	59459.8	1.16136e+07	27585.7	3.66462e+07	87045.6
Lake Minchumina CDP	1.76369e+06	58789.7	3.47328e+07	1.15776e+06	3.64965e+07	1.21655e+06
Petersville CDP	3.34592e+06	123923	3.21851e+07	1.19204e+06	3.5531e+07	1.31596e+06
Atmautluak CDP	2.7336e+07	70818.7	7.23098e+06	18733.1	3.4567e+07	89551.8
Grayling city	1.43816e+07	68484	1.91882e+07	91372.4	3.35698e+07	159856
Quinhagak city	7.35962e+06	9484.04	2.51622e+07	32425.6	3.25219e+07	41909.6
Shageluk city	1.46302e+07	146302	1.78708e+07	178708	3.2501e+07	325010
Manley Hot Springs CDP	1.03097e+07	61004.2	2.19884e+07	130109	3.22981e+07	191113
Bettles city	1.59839e+07	694952	1.60107e+07	696116	3.19946e+07	1.39107e+06
Napakiak city	2.11957e+07	59205.8	9.53754e+06	26641.2	3.07332e+07	85846.9
Eagle Village CDP	264616	4992.75	2.89528e+07	546279	2.92174e+07	551271
Takotna CDP	3.51658e+06	62796	2.50784e+07	447828	2.8595e+07	510624
Buckland city	2.12721e+07	38676.5	6.4195e+06	11671.8	2.76916e+07	50348.3
Unalakleet city	8.00641e+06	10465.9	1.89406e+07	24758.9	2.6947e+07	35224.8
St. Michael city	1.46184e+07	32058	1.19561e+07	26219.6	2.65746e+07	58277.6
Mekoryuk city	5.44627e+06	26438.2	2.00568e+07	97363.1	2.55031e+07	123801
Dry Creek CDP	1.07816e+06	17674.7	2.43212e+07	398709	2.53994e+07	416384
Huslia city	1.92131e+07	63201	5.89109e+06	19378.6	2.51042e+07	82579.5
Fishhook CDP	2.06544e+07	4091.61	3.77163e+06	747.153	2.44261e+07	4838.76
Teller city	1.45346e+07	58372	9.63061e+06	38677.1	2.41652e+07	97049.1
Evansville CDP	7.27825e+06	606521	1.6653e+07	1.38775e+06	2.39313e+07	1.99427e+06
Anvik city	0	0	2.36762e+07	338232	2.36762e+07	338232
Chefornak city	1.28172e+07	25330.3	1.01431e+07	20045.7	2.29603e+07	45376.1
Tetlin CDP	5.1561e+06	40921.4	1.71696e+07	136267	2.23257e+07	177188
Nikolai city	7.86864e+06	88411.7	1.41165e+07	158612	2.19851e+07	247024
Kasigluk CDP	4.04018e+06	6485.04	1.78287e+07	28617.5	2.18689e+07	35102.5
Toksook Bay city	6.3943e+06	9717.78	1.54095e+07	23418.7	2.18038e+07	33136.5
Eagle city	1.22074e+07	147077	9.49576e+06	114407	2.17032e+07	261484
Beaver CDP	7.02501e+06	146354	1.45816e+07	303783	2.16066e+07	450138
Shungnak city	6.21761e+06	22858.8	1.43913e+07	52909.1	2.06089e+07	75767.9
Glacier View CDP	0	0	2.05683e+07	54848.7	2.05683e+07	54848.7
Nightmute city	8.45459e+06	27629.4	1.07611e+07	35167	1.92157e+07	62796.4
Tununak CDP	4.07955e+06	9925.9	1.45656e+07	35439.4	1.86451e+07	45365.3
Chalkyitsik CDP	8.66539e+06	154739	9.89417e+06	176682	1.85596e+07	331421
Dot Lake Village CDP	6.66777e+06	289903	1.17204e+07	509582	1.83881e+07	799485
Stevens Village CDP	8.83093e+06	238674	9.01565e+06	243666	1.78466e+07	482340
Deering city	8.54673e+06	46960.1	7.60539e+06	41787.9	1.61521e+07	88747.9
Tanacross CDP	1.28088e+06	8895	1.43389e+07	99575.6	1.56198e+07	108471
Sleetmute CDP	3.46077e+06	36429.1	1.07555e+07	113216	1.42163e+07	149645
Mertarvik CDP	6.36986e+06	64342.1	7.28867e+06	73622.9	1.36585e+07	137965
Crooked Creek CDP	5.05517e+06	56168.6	8.03421e+06	89269.1	1.30894e+07	145438
Alatna CDP	5.33892e+06	355928	7.50844e+06	500563	1.28474e+07	856491
Pitkas Point CDP	7.26935e+06	60577.9	5.37624e+06	44802	1.26456e+07	105380
Hughes city	7.98787e+06	93975	4.62465e+06	54407.6	1.26125e+07	148383
Koyukuk city	8.10789e+06	82733.6	3.56427e+06	36370.1	1.16722e+07	119104
Alcan Border CDP	0	0	1.0492e+07	291444	1.0492e+07	291444
Nunam Iqua city	702108	3235.52	8.59753e+06	39619.9	9.29964e+06	42855.5
Oscarville CDP	5.86415e+06	83773.6	2.08563e+06	29794.7	7.94978e+06	113568
Red Devil CDP	1.69947e+06	77248.9	6.05024e+06	275011	7.74971e+06	352260
Chickaloon CDP	542494	2135.8	7.05307e+06	27768	7.59556e+06	29903.8
Birch Creek CDP	0	0	7.3332e+06	209520	7.3332e+06	209520
Stony River CDP	4.01766e+06	70485.2	3.12705e+06	54860.5	7.14471e+06	125346
Four Mile Road CDP	2.79389e+06	155216	4.22192e+06	234551	7.0158e+06	389767
Lime Village CDP	0	0	6.48557e+06	498890	6.48557e+06	498890
Golovin city	0	0	5.59575e+06	31975.7	5.59575e+06	31975.7
Willow CDP	4.77038e+06	2172.3	490056	223.158	5.26044e+06	2395.46
Brevig Mission city	1.10544e+06	2582.8	2.20118e+06	5142.95	3.30662e+06	7725.76
Koyuk city	0	0	3.12755e+06	10024.2	3.12755e+06	10024.2
Elim city	565170	1544.18	2.18796e+06	5978.03	2.75313e+06	7522.21
Ferry CDP	531480	31263.5	2.15751e+06	126913	2.68899e+06	158176
Healy Lake CDP	228751	9531.29	1.42661e+06	59442.2	1.65536e+06	68973.5
Chase CDP	1.63029e+06	85804.8	0	0	1.63029e+06	85804.8
