# Supplementary material for: Deep learning-based building and road detection reveals higher permafrost thaw-related damage costs than previously estimated for Alaska
Source: Research Square preprint supplement (doi:10.21203/rs.3.rs-4783812/v1), 2024-09-27
Supplement: Supplementary file 3 [file ef43548ac76dabc398c4a53f.xlsx]

## Sheet: combined_county_costsFINAL
Supplementary Table. Projected average damage costs of buildings and roads in Alaskan boroughs and census areas on discontinuous and continuous permafrost at risk of bearing capacity loss and ground subsidence (sorted by total cost). Infrastructure damage costs are calculated separately based on bearing capacity loss and subsidence projected by the AWI-CM-1-1-MR, MPI-ESM1-2-HR, and NorESM2-MM GCM…
NAME	Average building cost	Average per capita building cost	Average road cost	Average per capita road cost	Total cost	Per capita cost
Fairbanks North Star Borough	7.40688e+09	77433.2	6.03824e+09	63125.2	1.34451e+10	140558
Yukon-Koyukuk Census Area	6.06123e+08	113442	9.26537e+09	1.73411e+06	9.87149e+09	1.84756e+06
North Slope Borough	2.25695e+09	204601	7.60722e+09	689622	9.86417e+09	894223
Southeast Fairbanks Census Area	1.18857e+09	174585	2.71371e+09	398606	3.90228e+09	573190
Copper River Census Area	4.76558e+08	182101	2.81929e+09	1.0773e+06	3.29585e+09	1.2594e+06
Bethel Census Area	1.61519e+09	86531.4	1.50422e+09	80586.2	3.11942e+09	167118
Nome Census Area	5.73382e+08	57075.6	1.7911e+09	178290	2.36448e+09	235365
Northwest Arctic Borough	9.50783e+08	122005	1.07725e+09	138233	2.02803e+09	260237
Kusilvak Census Area	6.36824e+08	76102.3	8.26307e+08	98746	1.46313e+09	174848
Matanuska-Susitna Borough	6.56486e+07	613.074	1.10467e+09	10316.2	1.17032e+09	10929.3
Denali Borough	2.8755e+08	177610	5.53963e+08	342163	8.41513e+08	519773
